# Supplementary material for: Proteome Analysis of Aflibercept Intervention in Experimental Central Retinal Vein Occlusion
Source: MDPI journal article supplement (doi:10.3390/molecules27113360), 2022-05-24
Supplement: s1 [file s1]

|                        |                                                                                                                                                                  |                                                                                                                                                                      |
|------------------------|------------------------------------------------------------------------------------------------------------------------------------------------------------------|----------------------------------------------------------------------------------------------------------------------------------------------------------------------|
| <p><b>Animal 1</b></p> | <p><b>A</b>      <b>Fibronectin</b><br/><b>CRVO</b></p> 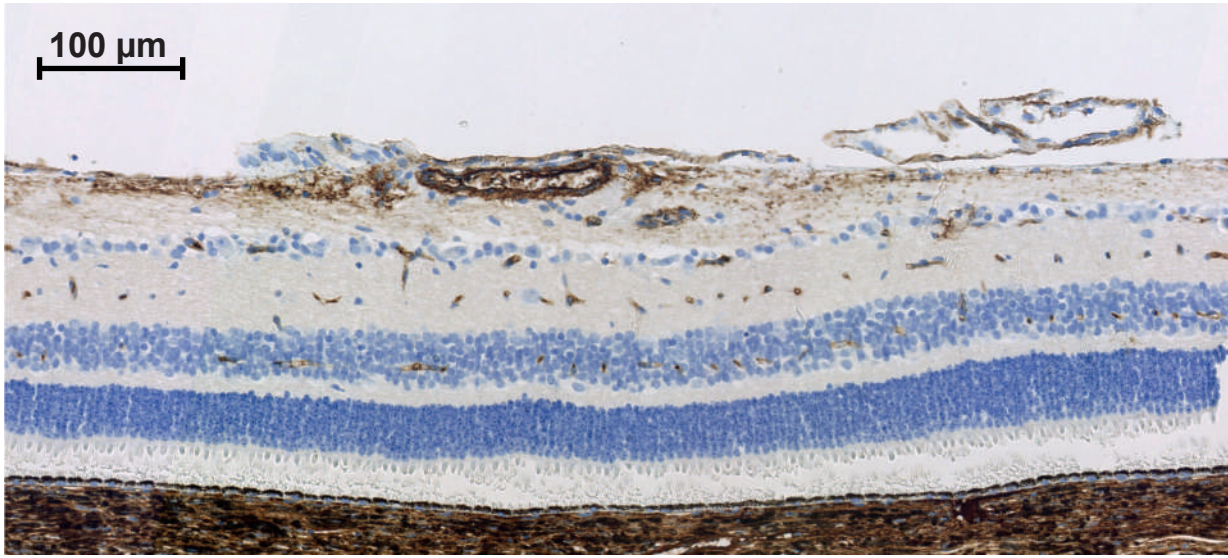                       | <p><b>B</b>      <b>Fibronectin</b><br/><b>Control</b></p>                        |
| <p><b>Animal 2</b></p> | <p><b>C</b>      <b>Fibronectin</b><br/><b>CRVO</b></p>                        | <p><b>D</b>      <b>Fibronectin</b><br/><b>Control</b></p>                        |
| <p><b>Animal 1</b></p> | <p><b>E</b>      <b>Galectin-3</b><br/><b>CRVO</b></p>                       | <p><b>F</b>      <b>Galectin-3</b><br/><b>Control</b></p>                       |
| <p><b>Animal 2</b></p> | <p><b>G</b>      <b>Galectin-3</b><br/><b>CRVO</b></p>                       | <p><b>H</b>      <b>Galectin-3</b><br/><b>Control</b></p>                       |
| <p><b>Animal 1</b></p> | <p><b>I</b>      <b>Neurofilament light polypeptide</b><br/><b>CRVO</b></p>  | <p><b>J</b>      <b>Neurofilament light polypeptide</b><br/><b>Control</b></p>  |
| <p><b>Animal 2</b></p> | <p><b>K</b>      <b>Neurofilament light polypeptide</b><br/><b>CRVO</b></p>  | <p><b>L</b>      <b>Neurofilament light polypeptide</b><br/><b>Control</b></p>  |
